# Supplementary material for: A multiscale, vertical-flow perfusion system with integrated porous microchambers for upgrading multicellular spheroid culture
Source: Royal Society of Chemistry journal article supplement (doi:10.1039/d3lc00168g), 2023-01-01
Supplement: d3lc00168g2.pdf [file d3lc00168g2.pdf]

## Supplementary Information

for

A multiscale, vertical-flow perfusion system with integrated  
porous microchambers for upgrading multicellular spheroid  
culture

*Mai Takagi, Masumi Yamada,\* Rie Utoh, and Minoru Seki*

Department of Applied Chemistry and Biotechnology,

Graduate School of Engineering, Chiba University

1-33 Yayoi-cho, Inage-ku, Chiba 263-8522, Japan.

\*E-mail: [m-yamada@faculty.chiba-u.jp](mailto:m-yamada@faculty.chiba-u.jp); Tel&Fax: +81-43-290-3398

## List of Supplementary Information

**Figures S1:** Scanning electron microscopic observation of the surface of the porous microchambers at centrifugation times of 1, 15, and 60 minutes.

**Figures S2:** Count of surface pores from the SEM images of randomly selected 10 porous microchambers.

**Figures S3:** Scanning electron microscopic observation of the NaCl particles utilized.

**Figures S4:** Visualization of flow profiles using 1.1  $\mu\text{m}$  particles in the non-porous chamber with the horizontal flow.

**Figures S5:** HE staining of the thin sections of the spheroids for the horizontal flow and vertical flow conditions.

**Movie S1:** Real-time movie showing the flow behaviors of 1.1  $\mu\text{m}$  particles through the porous microchambers at different locations in the device. Particle behaviors at the chamber bottom for 5 s are shown. The input flow rate of the particle suspension was 10  $\mu\text{L}/\text{min}$ , which was set to clearly visualize the particle movements.

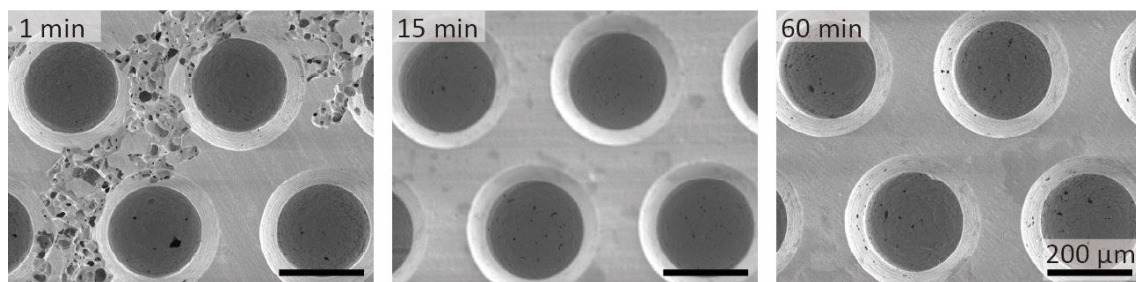

**Figure S1.** Scanning electron microscopic (SEM) images of the surface of the porous microchambers when the centrifugation time was varied from 1, 15, and 60 min.

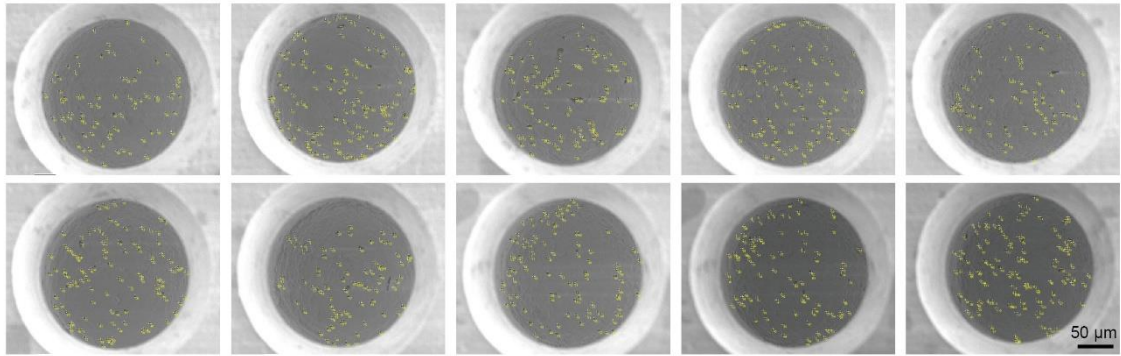

**Figure S2.** Count of surface pores from the SEM images of randomly selected 10 porous microchambers. Each small yellow dot indicates the count number of the surface pore.

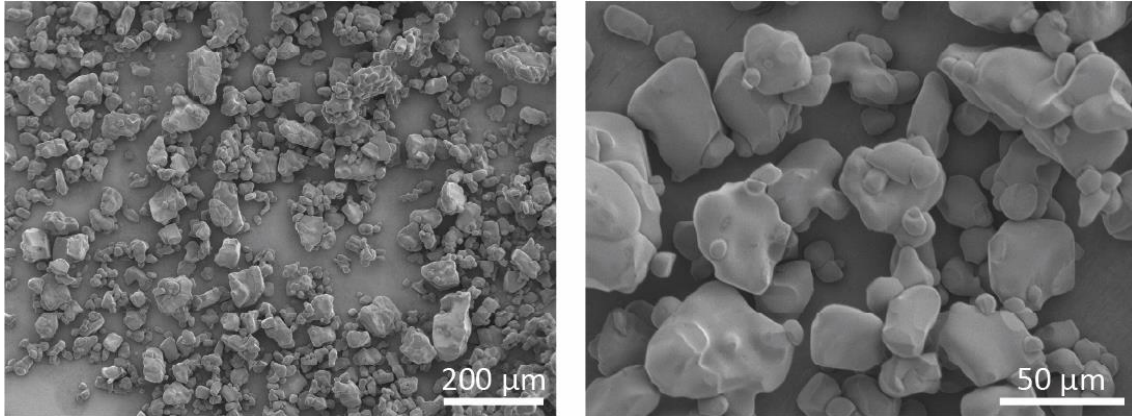

**Figure S3.** Scanning electron microscopic (SEM) images of the NaCl particles ( $\phi = 30\text{--}60\ \mu\text{m}$ ) used as a porogen to prepare the porous microchambers.

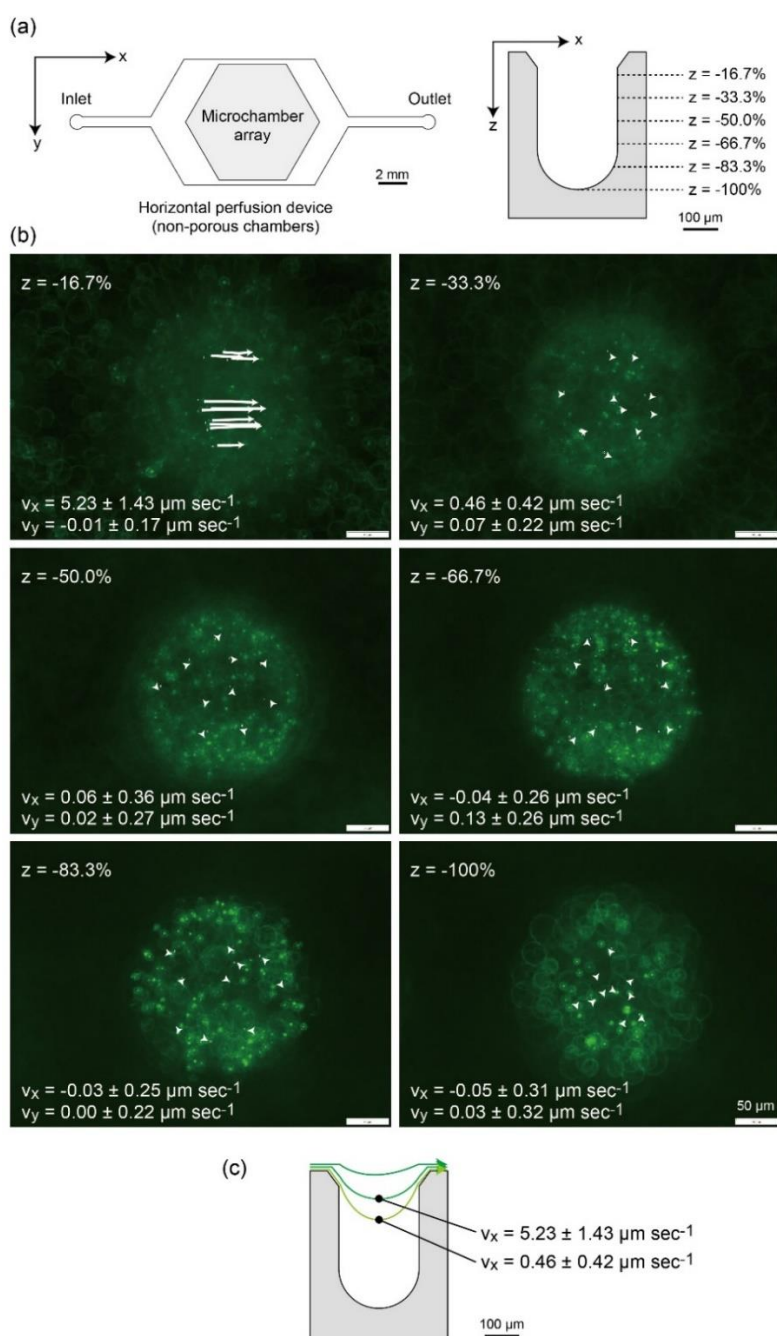

**Figure S4.** Visualization of flow profiles using 1.1  $\mu\text{m}$  particles in the non-porous chamber with the horizontal flow. (a) Design of the microchannel and the depth ( $z$ ) position of observation. (b) Particle behavior at different  $z$  positions. The movements of single particles in an interval of 5 s were analyzed and averaged. Vectors of movements of representative 10 particles are shown as white arrows. (c) Schematic image showing the flow profile in the cross-section of the chamber. We confirmed that the stagnant region was formed in the area from the  $\sim 1/3$  location from the surface to the bottom of the chamber.

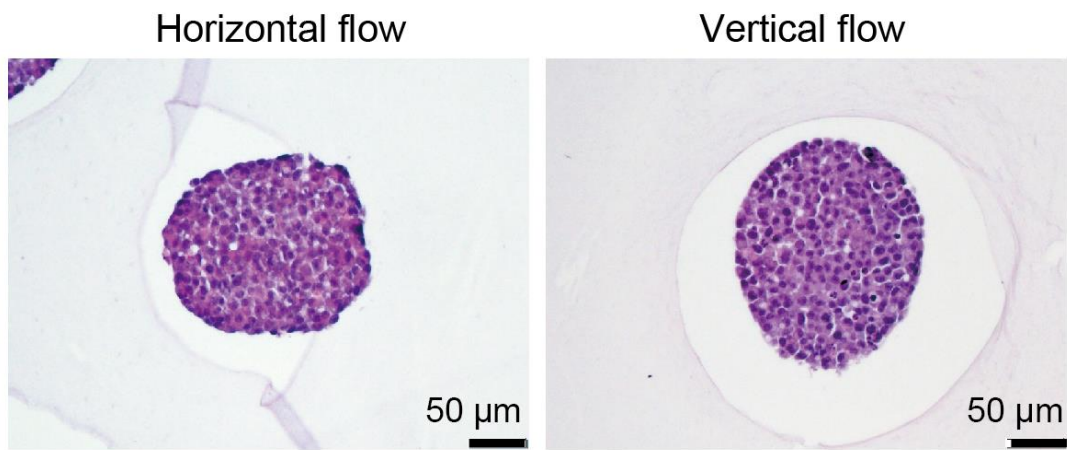

**Figure S5.** HE staining of the thin sections of the spheroids for the horizontal flow and vertical flow conditions.
